# Supplementary material
Source: PubMed Central journal article supplement (PMC3606068)

Supplementary Figure S1. NIH organ severity score at onset of second-line treatment.

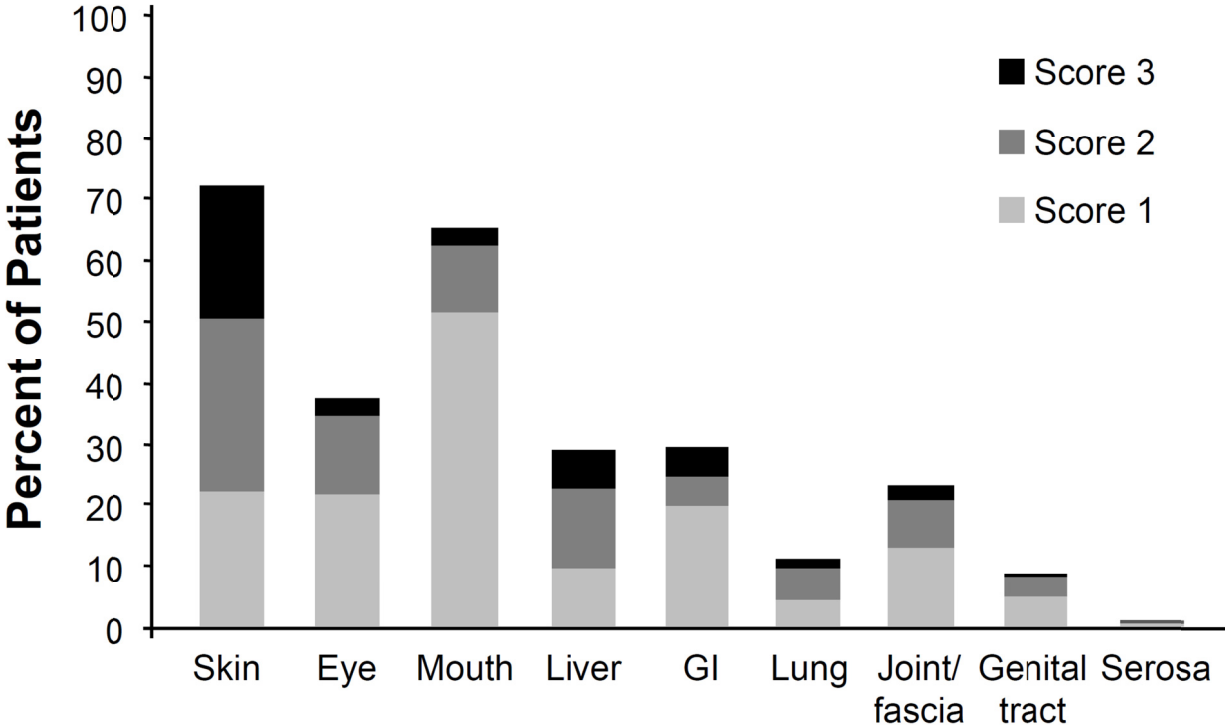

Supplement: supp_blood-2012-11-465583_blood-2012-11-465583-1.pdf [file supp_blood-2012-11-465583_blood-2012-11-465583-1.pdf]
